# Supplementary material for: Green process development for the preparation of 2,6-dibromo-4-nitroaniline from 4-nitroaniline using bromide–bromate salts in an aqueous acidic medium
Source: Royal Society of Chemistry journal article supplement (doi:10.1039/c6ra13680j), 2016-01-01

## Supporting Information

### **Green Process Development for the Preparation of 2, 6-Dibromo-4-nitroaniline from 4-Nitroaniline Using Bromide-Bromate Salts in Aqueous Acidic Medium**

**Venkatanarayana Pappula and Subbarayappa Adimurthy\***

*Academy of Scientific & Innovative Research, CSIR–Central Salt & Marine Chemicals Research Institute, G.B. Marg, Bhavnagar-364 002. Gujarat (INDIA)*

#### **Table of Contents:**

|                                                                             |                |
|-----------------------------------------------------------------------------|----------------|
| <b>General Experimental section</b>                                         | <b>S2</b>      |
| <b>Table S1</b>                                                             | <b>S3</b>      |
| <b>Characterization of Product DBPNA</b>                                    | <b>S4</b>      |
| <b>Copies of <sup>1</sup>H &amp; <sup>13</sup>C- NMR of DBPNA</b>           | <b>S5 – S5</b> |
| <b>Copies of GC-MS &amp; LC-MS for DBPNA</b>                                | <b>S7 –S8</b>  |
| <b>FT-IR spectra of DBPNA</b>                                               | <b>S9</b>      |
| <b>Table S2</b>                                                             | <b>S10</b>     |
| <b>Characterization &amp; spectral copies of other synthesized products</b> | <b>S11</b>     |

## Experimental Section:

**General:** All commercially available chemicals and reagents were used without any further purification unless otherwise indicated.  $^1\text{H}$  and  $^{13}\text{C}$  NMR spectra were recorded at 500 and 125 MHz, respectively. The spectra were recorded in  $\text{DMSO-d}_6$  as solvent. Multiplicity was indicated as follows: s (singlet); Chemical shifts are reported in ppm relative to TMS as an internal standard. The peaks around delta values of  $^1\text{H}$  NMR (2.5, 3.4), and  $^{13}\text{C}$  NMR (40) are correspond to deuterated solvent  $\text{DMSO-d}_6$ . Progress of the reactions was monitored by thin layer chromatography (GC).

**General procedure for bromination of PNA in Table S1:** 4-Nitroaniline (PNA), solvent, and aqueous brominating reagents (indicated in Table S1) were taken in a round bottomed flask (RBF) fitted with magnetic stirrer. To the above mixture, 3 equivalents of 35%  $\text{HCl}$  (1.58 g, 43.3 mmol) for entries 1 and 2 and 1.5 equivalents of 98%  $\text{H}_2\text{SO}_4$  (10.65 g, 108 mmol) for entry 3 and 6 or 1 equiv of 98%  $\text{H}_2\text{SO}_4$  (0.71 g, 7.24 mmol) for entry 4 and 5 was added drop wise slowly to the reaction mixture under stirring at room temperature for 30 minutes followed by 1.5 equiv of 30%  $\text{H}_2\text{O}_2$  (0.3 g or 3.7 g, 10.8 mmol) for one hour (entries 3-5). After complete addition of  $\text{H}_2\text{O}_2$  the stirring was continued for stirring 2.5 h. After completion of the reaction the reaction, it was filtered and washed with water. The yellow solid obtained was oven dried for one hour then characterized (yield and purity in indicated in Table S1). *Note:* Better yield of the product was obtained by performing the reaction with reverse addition; that is by the addition of brominating reagent solution slowly to the aqueous acidic PNA taken in the reaction flask.

**Table S1.** Bromination of PNA under different conditions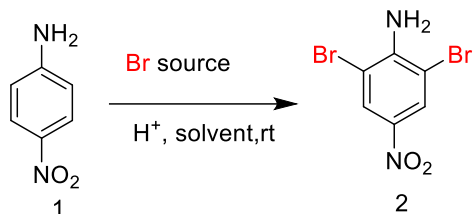

| entry          | Br source                     | H <sup>+</sup> source(equiv)/<br>oxidant(equiv)                        | solvent(ml)            | yield of 2(%) | GC-purity(%) |
|----------------|-------------------------------|------------------------------------------------------------------------|------------------------|---------------|--------------|
| 1              | NaBr/NaBrO <sub>3</sub> (2:1) | HCl (3)                                                                | DCM(20)                | 63            | 100          |
| 2              | NaBr/NaBrO <sub>3</sub> (2:1) | HCl (3)                                                                | CH <sub>3</sub> OH(20) | 85            | 95           |
| 3              | Alkaline bromine(5:1)         | H <sub>2</sub> SO <sub>4</sub> (1.5)/H <sub>2</sub> O <sub>2</sub> (2) | water                  | 82            | 49           |
| 4              | NaBr/NaBrO <sub>3</sub> (5:1) | H <sub>2</sub> SO <sub>4</sub> (1)/H <sub>2</sub> O <sub>2</sub> (2)   | water                  | 75            | 35           |
| 5 <sup>a</sup> | NaBr/NaBrO <sub>3</sub> (5:1) | H <sub>2</sub> SO <sub>4</sub> (1)/H <sub>2</sub> O <sub>2</sub> (2)   | water                  | 82            | 85           |
| 6 <sup>b</sup> | NaBr/NaBrO <sub>3</sub> (2:1) | H <sub>2</sub> SO <sub>4</sub> (1.5)                                   | water                  | 95            | 100          |

Reaction conditions: Performed at 2.0 PNA (14.4 mmol) for entries 1 and 2, NaBr (1.98 g, 19 mmol), NaBrO<sub>3</sub> (1.44 g, 9.5 mmol); for entry 3 reaction performed at 10 g scale of PNA (72.4 mmol), 46.5 ml of alkaline bromine solution having total bromine content 0.25 g/ml; for entries 4 and 5 reaction performed at 1.0 g of PNA (7.24 mmol), NaBr (1.24 g, 12 mmol), NaBrO<sub>3</sub> (0.36 g, 2.38 mmol), reaction times 4h. <sup>a</sup>Reaction performed in closed neck flask. <sup>b</sup>Reaction performed by the addition of brominating reagent solution to the flask containing PNA, aqueous H<sub>2</sub>SO<sub>4</sub>.

## Characterisation data for DBPNA:

### 2,6-dibromo-4-nitroaniline (2a):

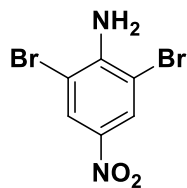

Yield (20.30 g, 95%, yellow solid, observed melting point 198 °C); <sup>1</sup>H NMR (500 MHz, DMSO-d<sub>6</sub>): δ 8.27 (s, 2H), 6.79 (s, 2H); <sup>13</sup>C NMR (125 MHz, DMSO-d<sub>6</sub>): 149.6, 136.9, 128.4, 105.8.; FT-IR (KBr): 3480, 3370, 3084, 2664, 1606, 1500, 1299, 1124, 898, 459 cm<sup>-1</sup>.; LC-MS: [M+H]<sup>+</sup> = 294.80.

### References:

- (1) a) Adimurthy, S.; Ramachandraiah, G.; Bedekar, A. V.; Ghosh, S.; Ranu, B. C.; Ghosh, P. K. *Green Chem.* **2006**, *8*, 916- 922.

# <sup>1</sup>H-NMR spectral of 2(DBPNA)

pp 66  
Venkat  
PP-66  
1H NMR in DMSO-d<sub>6</sub>, 500MHz

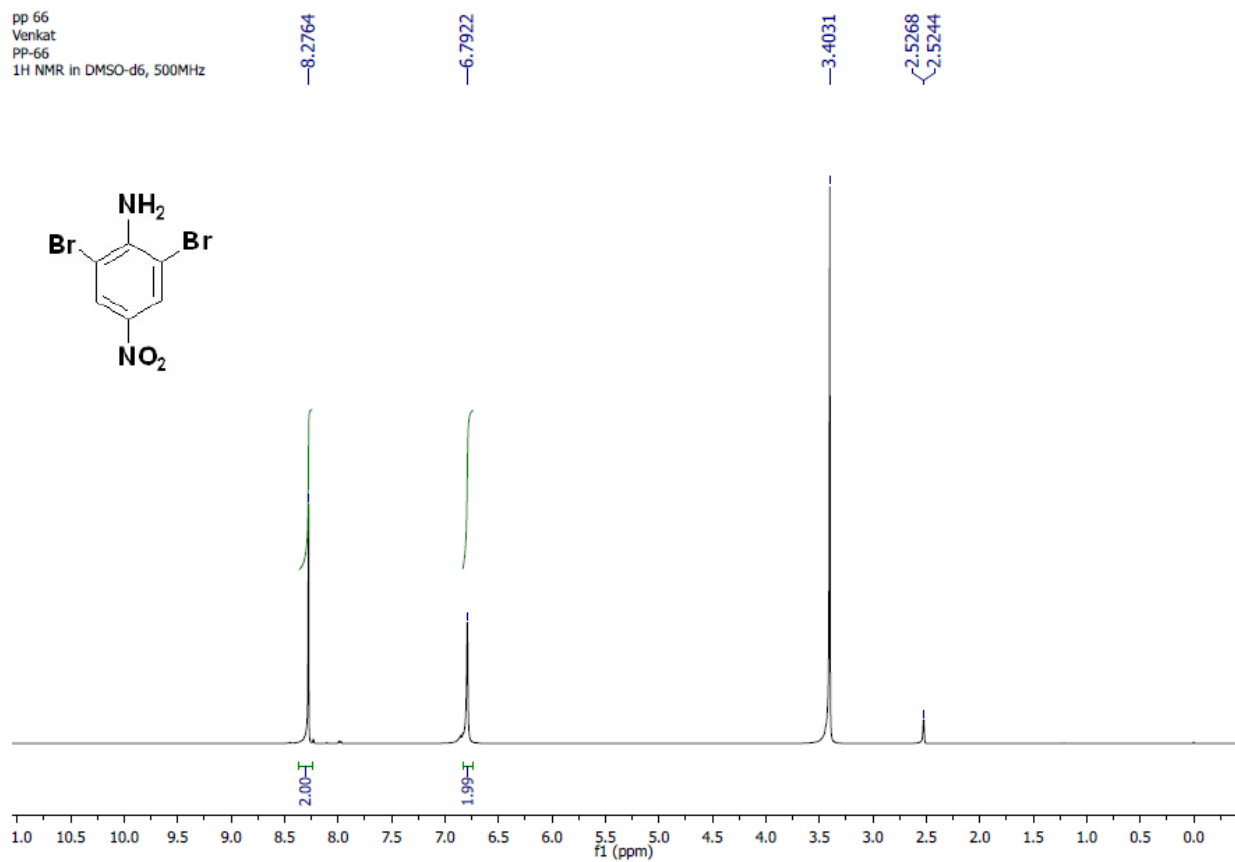

# <sup>13</sup>C-NMR spectral of 2 (DBPNA)

pp 66  
Venkat  
PP-66  
13C NMR in DMSO-d<sub>6</sub>, 500MHz

—149.6831

—136.9396

—128.4577

—105.8350

40.4871  
40.3209  
40.1544  
39.9878  
39.8210  
39.6544  
39.4880

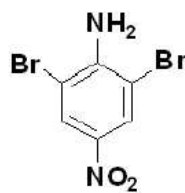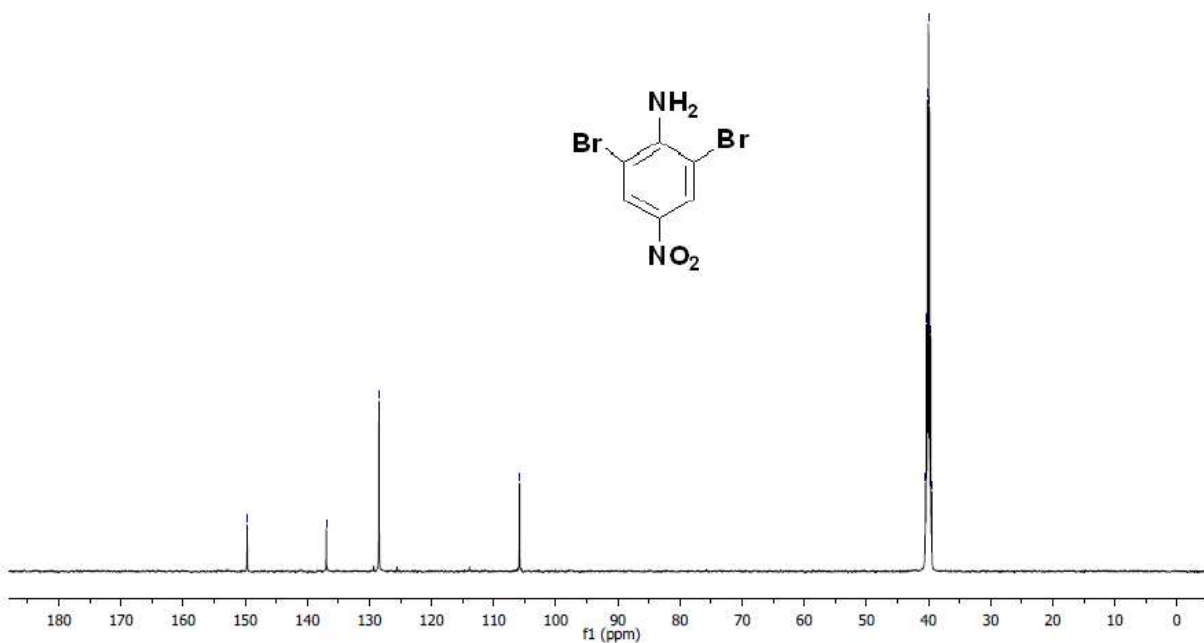

# GC-MS of DBPNA

Central Salt and Marine Chemicals Research Institute

## Sample Information

Analyzed by : Admin  
Analyzed : 8/6/2013 3:56:33 PM  
Sample Type : Unknown  
Sample Name : PP 656  
Sample ID : PP 656  
Vial # : 1  
Injection Volume : 0.200  
Data File : F:\GCMSDATA\Data\Project1\ANALYTICAL SCINCE\V T\PP 66\_060813\_07.QGD  
Method File : C:\GCMSsolution\Data\Project1\PNBBR.qgm  
Tuning File : C:\GCMSsolution\System\Tune\1180713.qgt

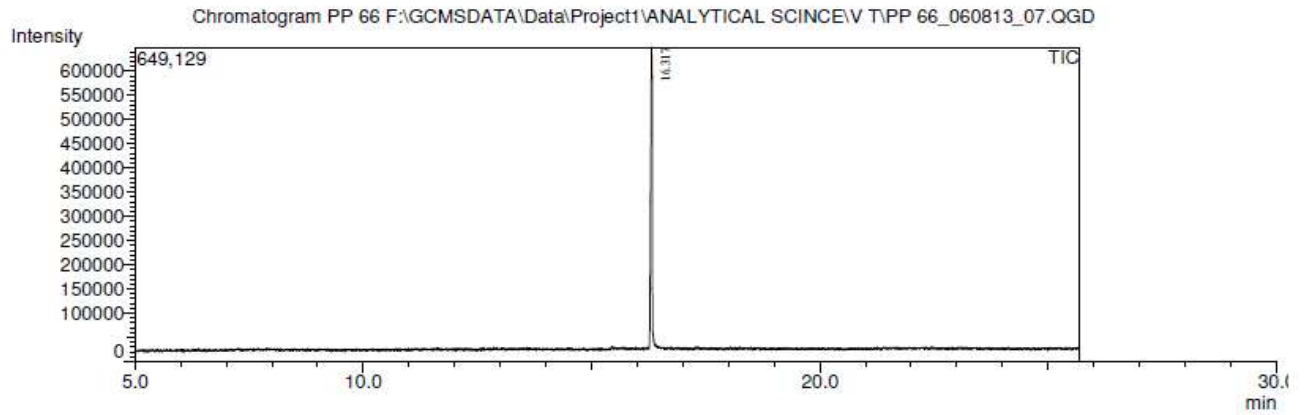

| Peak# | R.Time | Area    | Area%  | Name                              | Base m/z |
|-------|--------|---------|--------|-----------------------------------|----------|
| 1     | 16.317 | 1422982 | 100.00 | Benzenamine, 2,6-dibromo-4-nitro- | 265.75   |
|       |        | 1422982 | 100.00 |                                   |          |

# LC-MS for DBPNA:

PP 66 N 3 (0.036)

1: TOF MS ES-  
879

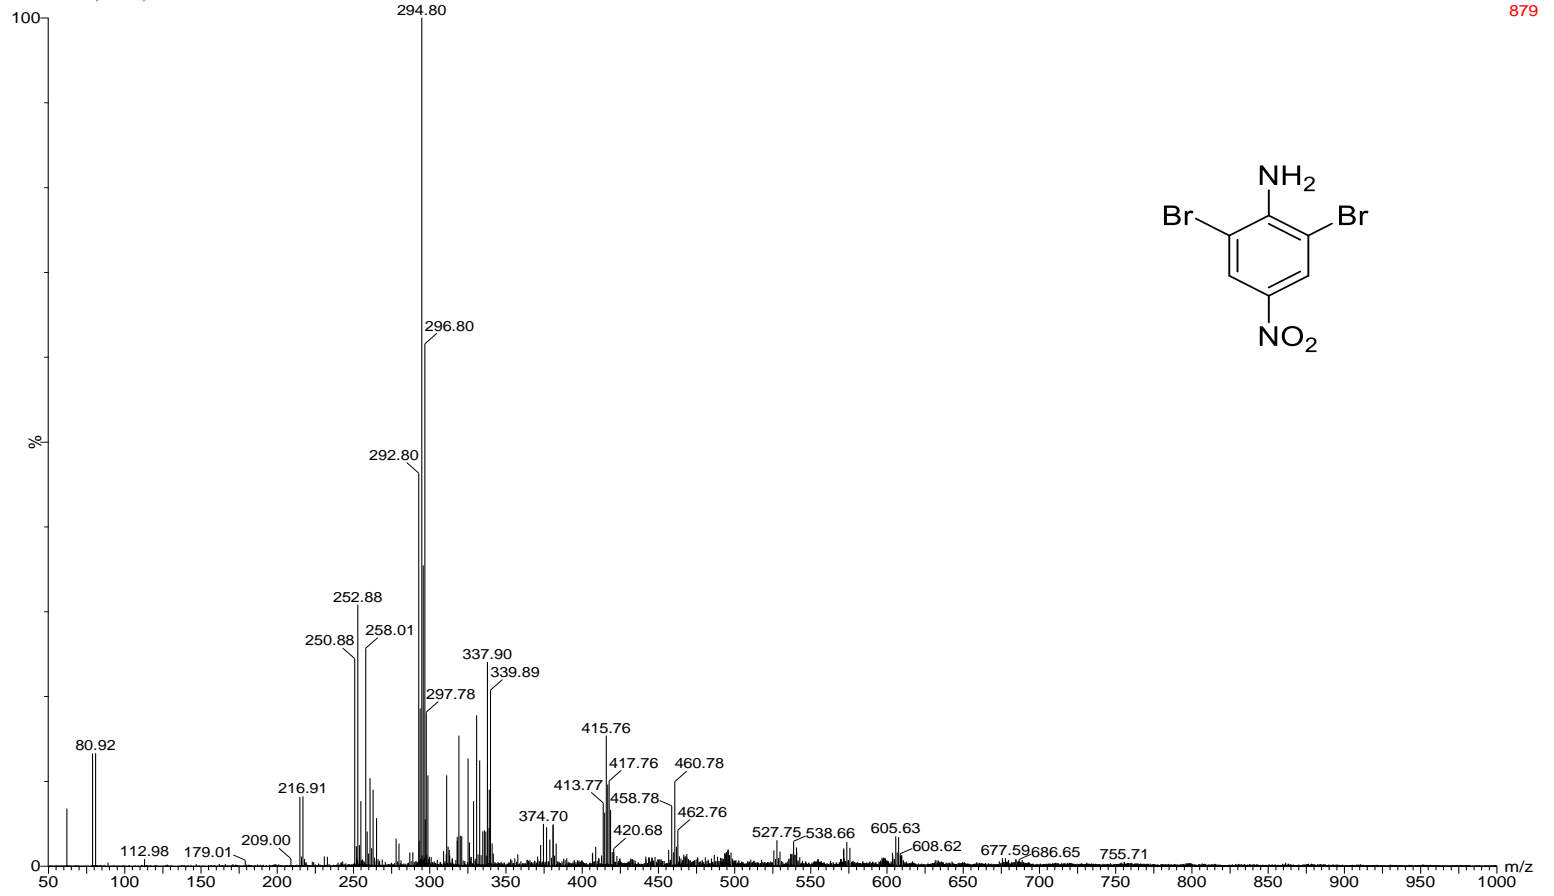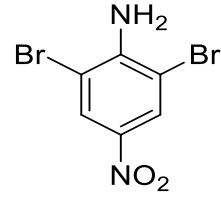



FT-IR- spectra of DBPNA.

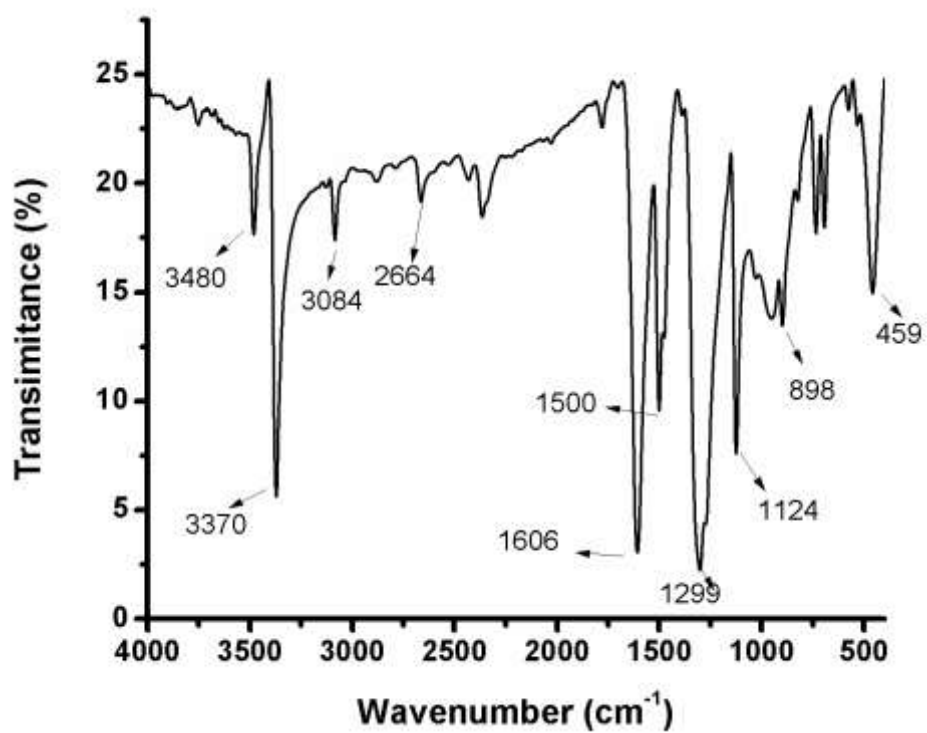

## Table S2. Analysis of DBPNA by Colourtex Industries.

**Colourtex Industries Ltd**

Survey No. 91, Paikee of Bhestan  
 Bhestan – 395 023, DIST, SURAT (INDIA)  
 Ph : 91-261-2891427/ 2891428  
 Fax : 91-261-2890080  
 Email : [ctx.export@colourtex.co.in](mailto:ctx.export@colourtex.co.in)

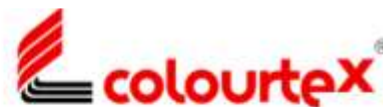

### *Certificate of Analysis*

DATE: 19/03/2013

**PRODUCT NAME** : 2:6 Dibromo p- Nitro Aniline  
**Lot. No.** : ----  
**Customer** : ----

| No. | Property                      | Colourtex Specification | Observation      |
|-----|-------------------------------|-------------------------|------------------|
| 1   | Physical Appearance           | Yellowish powder        | Yellowish powder |
| 2   | Purity (by HPTLC)             | 98.00% Min.             | 96.83%           |
| 3   | OBPNA Content (by HPTLC)      | 0.50% Max.              | 1.14%            |
| 4   | Moisture Content (by K.F.)    | 0.50% Max.              | 0.20%            |
| 5   | PNA Content (by HPTLC)        | ND                      | ND               |
| 6   | DCPNA Content (by HPLC)       | 100 ppm Max.            | 60.58 ppm        |
| 7   | PCP Content (by HPLC)         | 10 ppm Max.             | 0.36 ppm         |
| 8   | Sum of TeCP Content (by HPLC) | 10 ppm Max.             | 0.41 ppm         |
| 9   | Sum of CB's Content (by GCMS) | 10 ppm Max.             | 2.32 ppm         |

**Approved & passed By**

**Colourtex Industries Ltd**

## Characterization of other synthesized products

### 2,4,6-tribromoaniline:

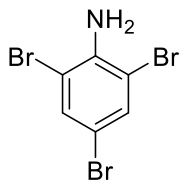

Yield (1.5 g, 94%);  $^1\text{H NMR}$  (200 MHz, DMSO)  $\delta$  7.63 (s, 2H), 5.54 (s, 2H).

### 4-amino-3,5-dibromobenzonitrile:

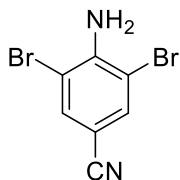

Yield (1.29 g, 93%);  $^1\text{H NMR}$  (200 MHz,  $\text{CDCl}_3$ )  $\delta$  7.65 (s, 2H), 5.13 (s, 2H).

### 4-amino-3,5-dibromobenzoic acid:

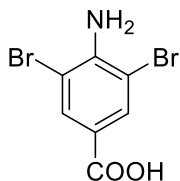

Yield (1.35 g, 95%);  $^1\text{H NMR}$  (200 MHz, DMSO)  $\delta$  7.63 (s, 2H), 5.53 (s, 2H).

### 4-amino-3,5-dibromobenzenesulfonic acid:

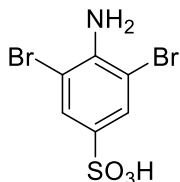

Yield (1.35 g, 95%);  $^1\text{H NMR}$  (200 MHz, DMSO)  $\delta$  7.63 (s, 2H), 5.52 (s, 2H).

**2,6-dibromo-4-chloroaniline:**

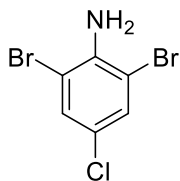

Yield (1.27 g, 84%);  $^1\text{H NMR}$  (200 MHz,  $\text{CDCl}_3$ )  $\delta$  7.38 (s, 2H), 4.54 (s, 2H).

**2,6-dibromo-3-chloro-4-fluoroaniline:**

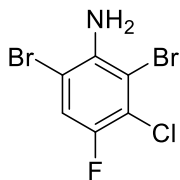

Yield (1.4 g, 92%);  $^1\text{H NMR}$  (200 MHz,  $\text{CDCl}_3$ )  $\delta$  7.31 (d,  $J = 8.1$  Hz, 1H), 4.55 (s, 2H).

**2,4,6-tribromophenol:**

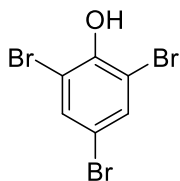

Yield (1.5 g, 90%);  $^1\text{H NMR}$  (200 MHz,  $\text{CDCl}_3$ )  $\delta$  7.58 (s, 1H), 5.89 (s, 1H).

**1-bromo-4-methoxybenzene:**

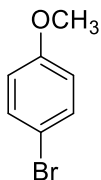

Yield (0.927 g, 98%);  $^1\text{H NMR}$  (200 MHz,  $\text{CDCl}_3$ )  $\delta$  7.26 (d,  $J = 8.9$  Hz, 2H), 6.66 (d,  $J = 8.9$  Hz, 2H), 3.65 (s, 3H).

Venkat  
Venkat  
PP-144  
1H NMR in DMSO-d6,200MHz

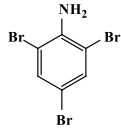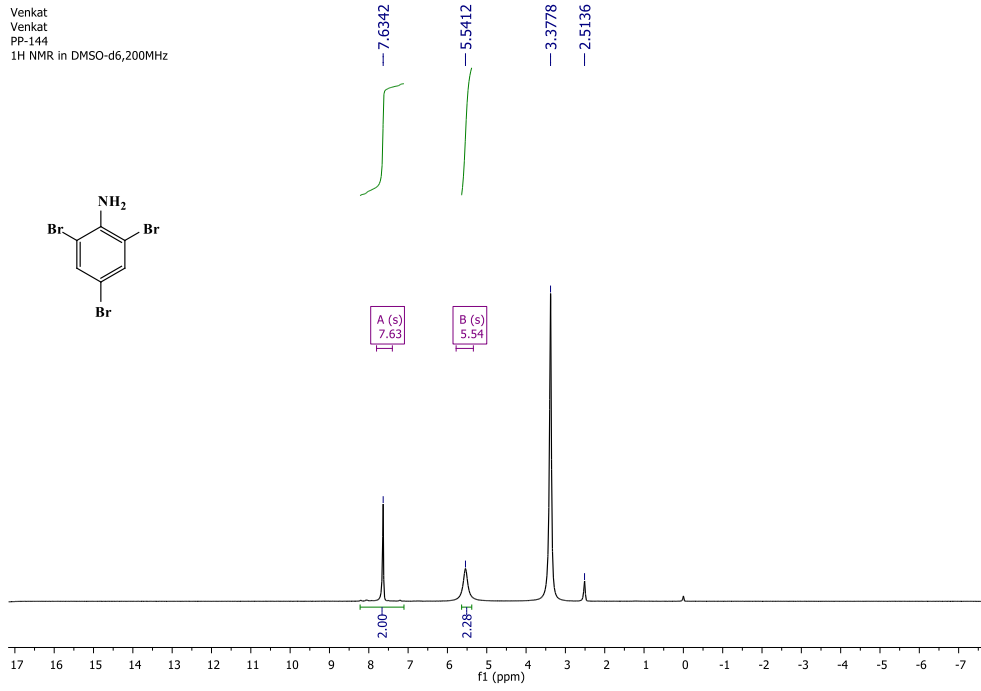

pp 153,pp157  
Ravi  
PP-153  
1H NMR in CDCl3,200MHz

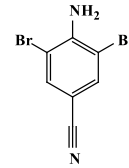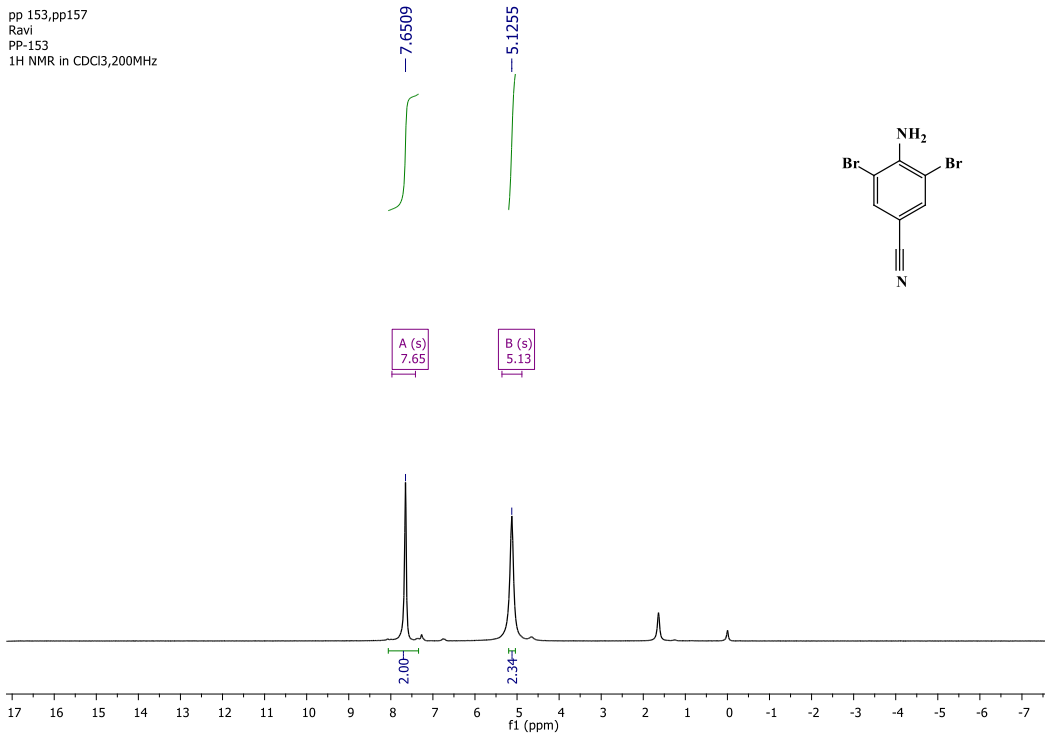

pp 145,pp 147,pp150  
Venkat  
PP-145  
1H NMR in DMSO-d6,200MHz

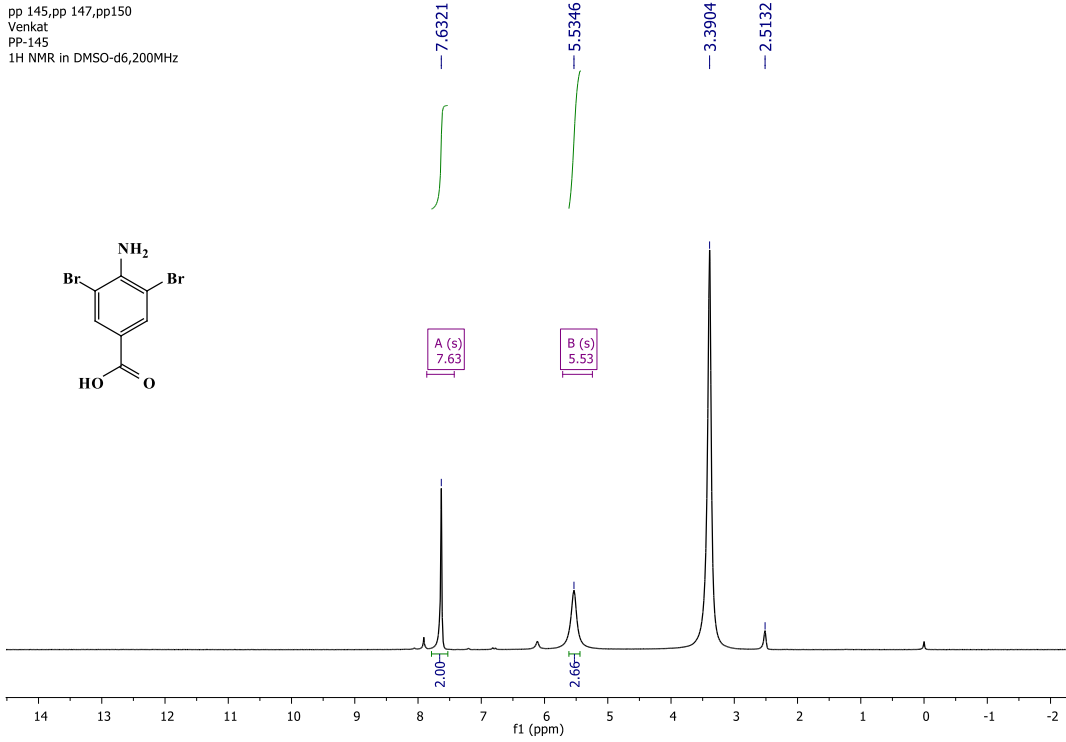

pp 145,pp 147,pp150  
Venkat  
PP-147  
1H NMR in DMSO-d6,200MHz

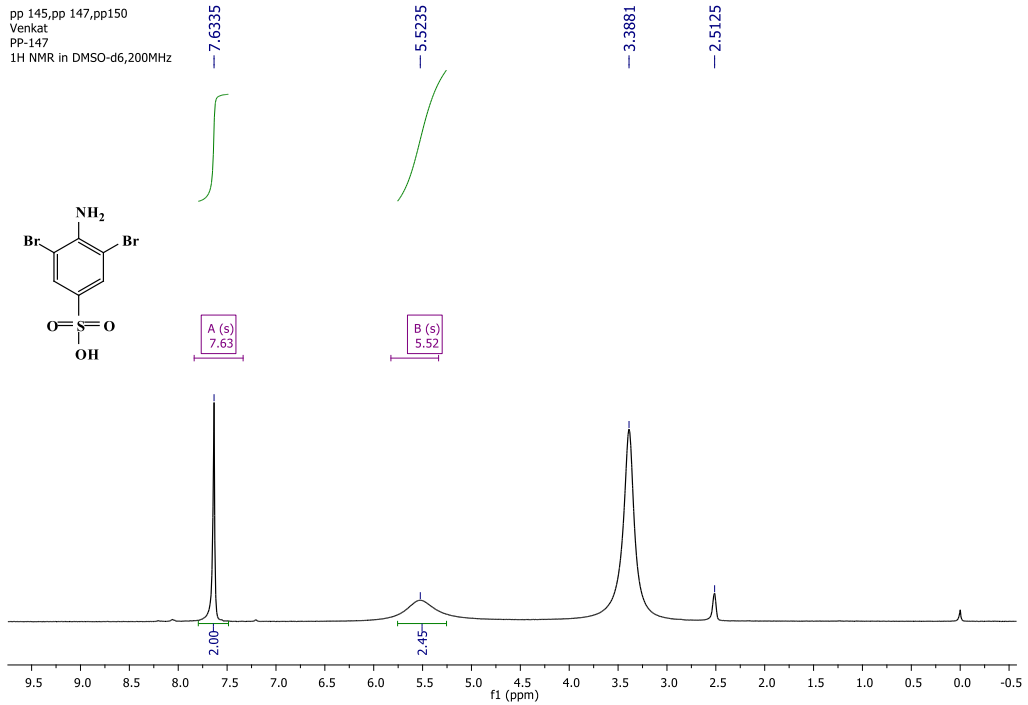

pp 147, pp 155, pp 154  
Supravat  
PP-155  
1H NMR in CDCl<sub>3</sub>, 200MHz

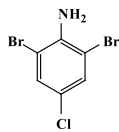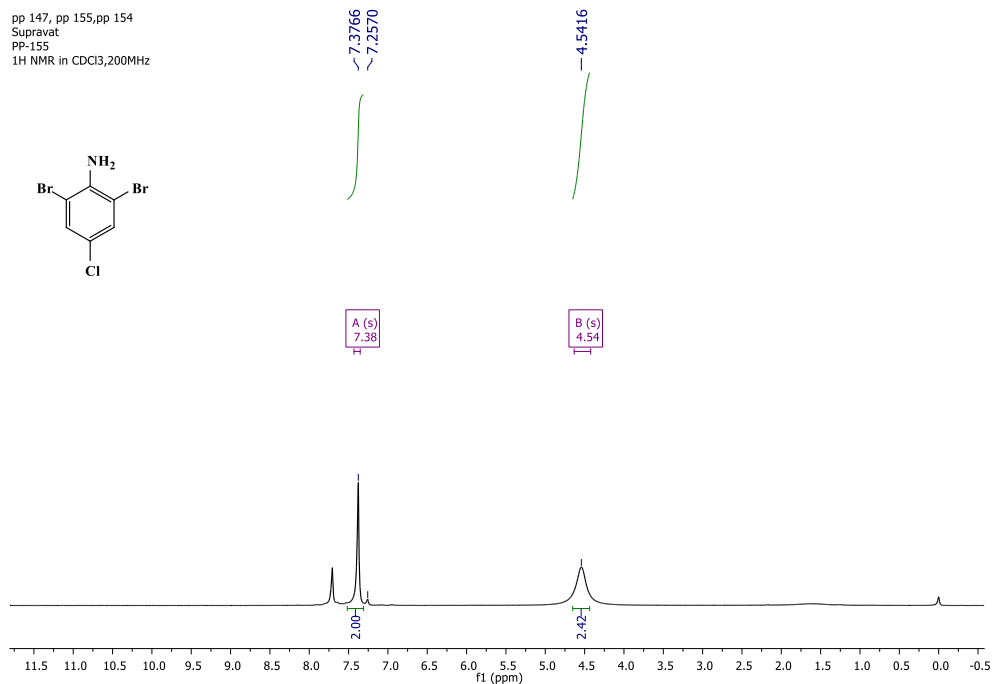

pp 130, pp137  
Venkat  
PP-130  
1H NMR in CDCl<sub>3</sub>, 200MHz

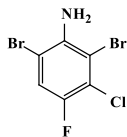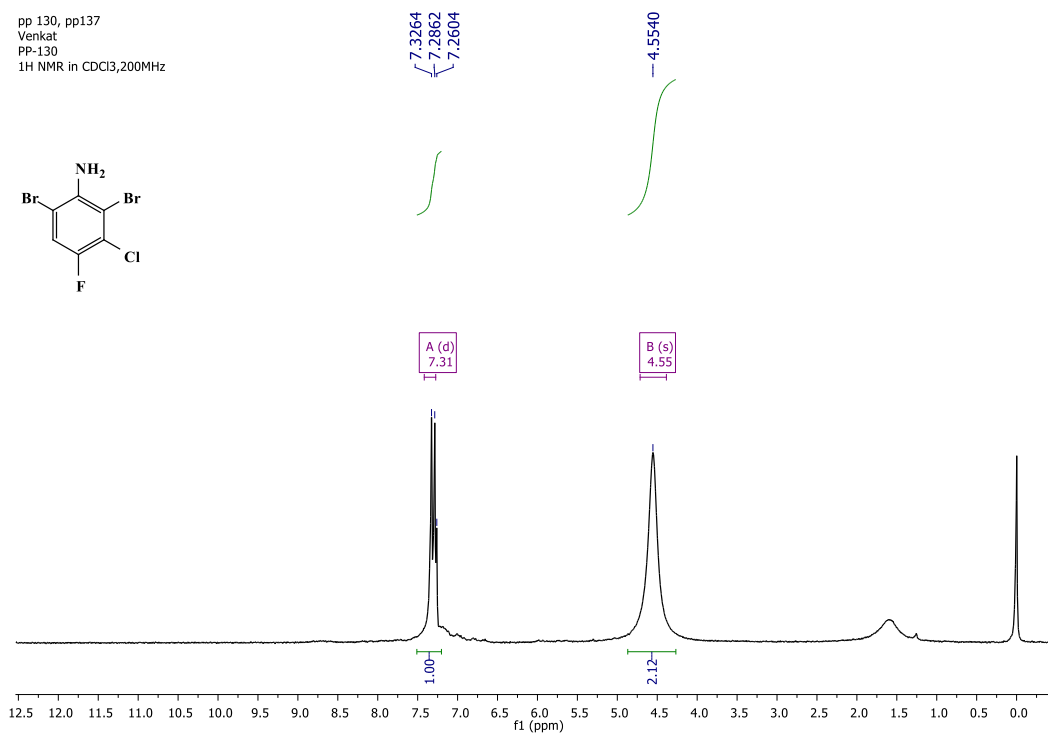

pp 145, pp 147, pp 150  
Venkat  
PP-150  
1H NMR in CDCl<sub>3</sub>, 200MHz

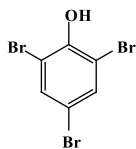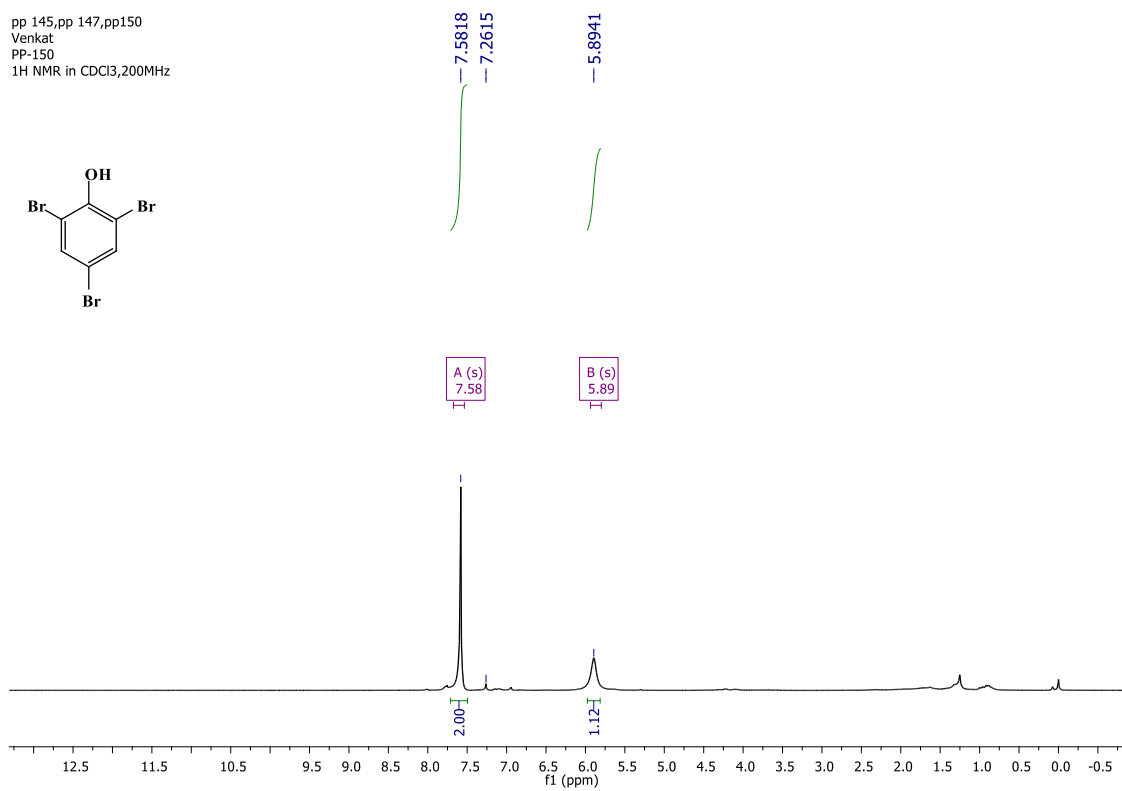

pp 130, pp 137  
Venkat  
PP-137  
1H NMR in CDCl<sub>3</sub>, 200MHz

7.2785  
7.2341  
6.6815  
6.6373

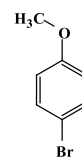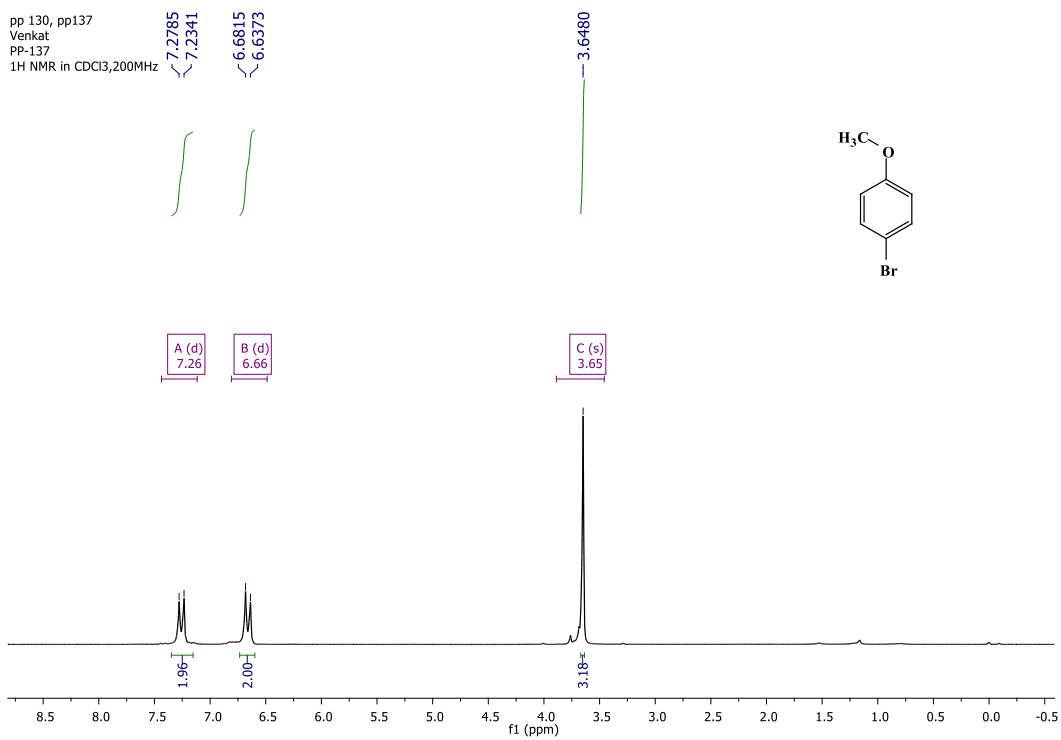

Supplement: c6ra13680j1.pdf [file c6ra13680j1.pdf]
